# Supplementary material for: Polymer Poly (Ethylene Oxide) Additive for High-Stability All-Inorganic CsPbI3−xBrx Perovskite Solar Cells
Source: MDPI journal article supplement (doi:10.3390/en16237849), 2023-11-30
Supplement: s1 [file s1]

Archive with 1 entries (1 files):
- energies-2724930-supplementary.pdf
